# Supplementary material for: Unsupervised Clustering Reveals Distinct Subtypes of Biliary Atresia Based on Immune Cell Types and Gene Expression
Source: Front Immunol. 2021 Sep 27;12:720841. doi: 10.3389/fimmu.2021.720841 (PMC8502897; doi:10.3389/fimmu.2021.720841)
Supplement: Supplementary file 2 [file Table_1.xls]

## Sheet: new Supplementary table 1
	Biliary Atresia	Diseased control	Normal control	Sample for internal control to normalize each batch of GeneChip microarray run	p
N	64	14	7	10
Condition (%)					<0.001
Biliary Atresia	64 (100.0)	0 ( 0.0)	0 ( 0.0)	0 ( 0.0)
Diseased control	0 ( 0.0)	14 (100.0)	0 ( 0.0)	0 ( 0.0)
Normal control	0 ( 0.0)	0 ( 0.0)	7 (100.0)	0 ( 0.0)
Sample for internal control to normalize each batch of GeneChip microarray run	0 ( 0.0)	0 ( 0.0)	0 ( 0.0)	10 (100.0)
aDC (mean (SD))	0.07 (0.04)	0.05 (0.03)	0.05 (0.03)	0.02 (0.01)	0.001
Adipocytes (mean (SD))	0.03 (0.02)	0.04 (0.02)	0.06 (0.02)	0.06 (0.01)	0.001
Astrocytes (mean (SD))	0.05 (0.03)	0.03 (0.02)	0.00 (0.00)	0.00 (0.00)	<0.001
B-cells (mean (SD))	0.02 (0.02)	0.03 (0.03)	0.00 (0.00)	0.00 (0.00)	0.002
Basophils (mean (SD))	0.06 (0.06)	0.12 (0.04)	0.08 (0.08)	0.07 (0.02)	0.005
CD4+ memory T-cells (mean (SD))	0.15 (0.08)	0.12 (0.09)	0.04 (0.03)	0.06 (0.04)	<0.001
CD4+ naive T-cells (mean (SD))	0.01 (0.02)	0.02 (0.02)	0.00 (0.00)	0.00 (0.00)	0.019
CD4+ T-cells (mean (SD))	0.05 (0.04)	0.05 (0.04)	0.00 (0.00)	0.02 (0.01)	0.003
CD4+ Tcm (mean (SD))	0.03 (0.04)	0.06 (0.05)	0.01 (0.03)	0.00 (0.00)	0.001
CD4+ Tem (mean (SD))	0.02 (0.03)	0.01 (0.01)	0.01 (0.01)	0.00 (0.00)	0.01
CD8+ naive T-cells (mean (SD))	0.04 (0.02)	0.04 (0.03)	0.04 (0.03)	0.06 (0.02)	0.247
CD8+ T-cells (mean (SD))	0.06 (0.05)	0.05 (0.04)	0.00 (0.00)	0.01 (0.01)	<0.001
CD8+ Tcm (mean (SD))	0.02 (0.04)	0.01 (0.03)	0.00 (0.00)	0.00 (0.00)	0.107
CD8+ Tem (mean (SD))	0.04 (0.05)	0.05 (0.04)	0.06 (0.04)	0.05 (0.02)	0.421
cDC (mean (SD))	0.01 (0.02)	0.01 (0.01)	0.00 (0.00)	0.00 (0.00)	0.015
Chondrocytes (mean (SD))	0.03 (0.04)	0.00 (0.01)	0.01 (0.02)	0.00 (0.00)	0.009
Class-switched memory B-cells (mean (SD))	0.03 (0.02)	0.05 (0.03)	0.02 (0.02)	0.01 (0.01)	<0.001
CLP (mean (SD))	0.11 (0.04)	0.06 (0.06)	0.11 (0.06)	0.16 (0.01)	<0.001
CMP (mean (SD))	0.04 (0.04)	0.11 (0.05)	0.04 (0.02)	0.03 (0.02)	<0.001
DC (mean (SD))	0.05 (0.03)	0.04 (0.03)	0.00 (0.00)	0.00 (0.00)	<0.001
Endothelial cells (mean (SD))	0.05 (0.03)	0.03 (0.03)	0.06 (0.04)	0.08 (0.01)	0.003
Eosinophils (mean (SD))	0.12 (0.08)	0.14 (0.08)	0.15 (0.11)	0.12 (0.05)	0.719
Epithelial cells (mean (SD))	0.13 (0.06)	0.05 (0.05)	0.08 (0.01)	0.07 (0.01)	<0.001
Erythrocytes (mean (SD))	0.03 (0.06)	0.12 (0.14)	0.00 (0.00)	0.00 (0.00)	<0.001
Fibroblasts (mean (SD))	0.07 (0.05)	0.03 (0.04)	0.00 (0.00)	0.00 (0.00)	<0.001
GMP (mean (SD))	0.06 (0.08)	0.05 (0.07)	0.02 (0.02)	0.04 (0.02)	0.443
Hepatocytes (mean (SD))	0.04 (0.02)	0.05 (0.01)	0.07 (0.02)	0.07 (0.01)	<0.001
HSC (mean (SD))	0.08 (0.05)	0.08 (0.06)	0.02 (0.02)	0.08 (0.02)	0.016
iDC (mean (SD))	0.05 (0.03)	0.04 (0.03)	0.00 (0.00)	0.00 (0.00)	<0.001
Keratinocytes (mean (SD))	0.04 (0.02)	0.03 (0.03)	0.02 (0.01)	0.01 (0.01)	<0.001
ly Endothelial cells (mean (SD))	0.03 (0.03)	0.04 (0.04)	0.08 (0.03)	0.07 (0.01)	<0.001
Macrophages (mean (SD))	0.12 (0.05)	0.10 (0.07)	0.07 (0.04)	0.14 (0.01)	0.025
Macrophages M1 (mean (SD))	0.02 (0.01)	0.01 (0.01)	0.03 (0.01)	0.02 (0.00)	0.145
Macrophages M2 (mean (SD))	0.14 (0.06)	0.15 (0.05)	0.11 (0.05)	0.22 (0.01)	<0.001
Mast cells (mean (SD))	0.02 (0.01)	0.03 (0.01)	0.01 (0.01)	0.02 (0.00)	<0.001
Megakaryocytes (mean (SD))	0.06 (0.03)	0.04 (0.04)	0.06 (0.03)	0.05 (0.02)	0.395
Melanocytes (mean (SD))	0.03 (0.02)	0.04 (0.02)	0.01 (0.01)	0.01 (0.01)	<0.001
Memory B-cells (mean (SD))	0.01 (0.02)	0.01 (0.01)	0.01 (0.02)	0.04 (0.01)	<0.001
MEP (mean (SD))	0.02 (0.03)	0.01 (0.03)	0.05 (0.06)	0.07 (0.02)	<0.001
Mesangial cells (mean (SD))	0.07 (0.03)	0.05 (0.03)	0.02 (0.03)	0.00 (0.00)	<0.001
Monocytes (mean (SD))	0.02 (0.03)	0.01 (0.02)	0.03 (0.03)	0.01 (0.01)	0.288
MPP (mean (SD))	0.18 (0.11)	0.27 (0.11)	0.23 (0.05)	0.20 (0.04)	0.019
MSC (mean (SD))	0.18 (0.10)	0.15 (0.11)	0.16 (0.06)	0.24 (0.04)	0.134
mv Endothelial cells (mean (SD))	0.13 (0.05)	0.11 (0.06)	0.20 (0.02)	0.20 (0.01)	<0.001
Myocytes (mean (SD))	0.01 (0.01)	0.02 (0.01)	0.03 (0.01)	0.04 (0.01)	<0.001
naive B-cells (mean (SD))	0.00 (0.01)	0.00 (0.01)	0.00 (0.00)	0.00 (0.00)	0.776
Neurons (mean (SD))	0.02 (0.01)	0.02 (0.01)	0.01 (0.01)	0.00 (0.00)	<0.001
Neutrophils (mean (SD))	0.06 (0.06)	0.04 (0.03)	0.05 (0.04)	0.00 (0.00)	0.013
NK cells (mean (SD))	0.01 (0.02)	0.01 (0.01)	0.02 (0.03)	0.04 (0.02)	<0.001
NKT (mean (SD))	0.11 (0.06)	0.12 (0.07)	0.28 (0.07)	0.17 (0.04)	<0.001
Osteoblast (mean (SD))	0.07 (0.06)	0.09 (0.07)	0.28 (0.13)	0.28 (0.02)	<0.001
pDC (mean (SD))	0.01 (0.02)	0.01 (0.01)	0.03 (0.02)	0.06 (0.01)	<0.001
Pericytes (mean (SD))	0.03 (0.02)	0.03 (0.02)	0.05 (0.01)	0.01 (0.01)	0.001
Plasma cells (mean (SD))	0.04 (0.03)	0.04 (0.02)	0.12 (0.05)	0.14 (0.01)	<0.001
Platelets (mean (SD))	0.03 (0.02)	0.04 (0.02)	0.03 (0.02)	0.05 (0.01)	0.016
Preadipocytes (mean (SD))	0.02 (0.02)	0.02 (0.02)	0.05 (0.02)	0.06 (0.01)	<0.001
pro B-cells (mean (SD))	0.03 (0.03)	0.06 (0.04)	0.02 (0.03)	0.01 (0.01)	0.002
Sebocytes (mean (SD))	0.01 (0.00)	0.00 (0.00)	0.00 (0.00)	0.00 (0.00)	<0.001
Skeletal muscle (mean (SD))	0.02 (0.01)	0.03 (0.01)	0.04 (0.01)	0.04 (0.01)	<0.001
Smooth muscle (mean (SD))	0.07 (0.05)	0.05 (0.05)	0.07 (0.06)	0.05 (0.03)	0.331
Tgd cells (mean (SD))	0.05 (0.04)	0.05 (0.05)	0.03 (0.03)	0.04 (0.01)	0.41
Th1 cells (mean (SD))	0.05 (0.05)	0.08 (0.07)	0.15 (0.04)	0.15 (0.02)	<0.001
Th2 cells (mean (SD))	0.04 (0.03)	0.04 (0.03)	0.03 (0.03)	0.04 (0.02)	0.965
Tregs (mean (SD))	0.05 (0.04)	0.05 (0.04)	0.02 (0.03)	0.02 (0.02)	0.005
ImmuneScore (mean (SD))	0.35 (0.10)	0.33 (0.11)	0.22 (0.09)	0.24 (0.01)	<0.001
StromaScore (mean (SD))	0.08 (0.04)	0.05 (0.03)	0.06 (0.02)	0.07 (0.01)	0.016
MicroenvironmentScore (mean (SD))	0.43 (0.10)	0.38 (0.09)	0.28 (0.07)	0.30 (0.01)	<0.001
