# Supplementary material for: Unsupervised Clustering Reveals Distinct Subtypes of Biliary Atresia Based on Immune Cell Types and Gene Expression
Source: Front Immunol. 2021 Sep 27;12:720841. doi: 10.3389/fimmu.2021.720841 (PMC8502897; doi:10.3389/fimmu.2021.720841)
Supplement: Supplementary file 4 [file Table_3.xlsx]

## Sheet: new supplemtary table 3
	Sybtype 1	Sybtype 2	Sybtype 3	Normal control	P
N	25	24	15	7
Subtype (%)					<0.001
Subtype 1	25 (100.0)	0 ( 0.0)	0 ( 0.0)	0 ( 0.0)
Subtype 2	0 ( 0.0)	24 (100.0)	0 ( 0.0)	0 ( 0.0)
Subtype 3	0 ( 0.0)	0 ( 0.0)	15 (100.0)	0 ( 0.0)
Normal control	0 ( 0.0)	0 ( 0.0)	0 ( 0.0)	7 (100.0)
CD68 (mean (SD))	10.33 (0.21)	10.72 (0.25)	10.04 (0.41)	9.87 (0.28)	<0.001
SDCBP (mean (SD))	9.98 (0.23)	10.31 (0.24)	9.22 (0.42)	9.34 (0.35)	<0.001
RAB18 (mean (SD))	9.61 (0.25)	9.87 (0.17)	9.16 (0.28)	9.43 (0.38)	<0.001
CD53 (mean (SD))	9.60 (0.33)	10.05 (0.35)	8.88 (0.48)	8.90 (0.39)	<0.001
RAP1B (mean (SD))	9.60 (0.19)	9.97 (0.18)	8.98 (0.45)	9.33 (0.41)	<0.001
TYROBP (mean (SD))	9.50 (0.24)	9.85 (0.30)	9.12 (0.33)	9.19 (0.29)	<0.001
ILF2 (mean (SD))	9.47 (0.20)	9.81 (0.20)	9.18 (0.34)	9.43 (0.37)	<0.001
PSMD7 (mean (SD))	9.40 (0.25)	9.64 (0.15)	9.09 (0.26)	9.66 (0.57)	<0.001
CCT2 (mean (SD))	9.32 (0.23)	9.64 (0.24)	8.90 (0.34)	9.12 (0.58)	<0.001
IQGAP1 (mean (SD))	9.44 (0.28)	9.68 (0.27)	8.99 (0.44)	8.67 (0.16)	<0.001
OSTF1 (mean (SD))	8.94 (0.14)	9.11 (0.17)	8.45 (0.28)	8.91 (0.22)	<0.001
PSMD6 (mean (SD))	8.80 (0.26)	9.09 (0.24)	8.42 (0.28)	9.18 (0.43)	<0.001
PSMD14 (mean (SD))	8.74 (0.21)	8.96 (0.22)	8.36 (0.30)	9.02 (0.60)	<0.001
RAP1A (mean (SD))	8.61 (0.23)	8.84 (0.25)	8.13 (0.33)	8.40 (0.41)	<0.001
FCER1G (mean (SD))	8.45 (0.35)	9.10 (0.40)	7.78 (0.51)	8.55 (0.50)	<0.001
SLC44A2 (mean (SD))	8.53 (0.21)	8.76 (0.27)	8.18 (0.31)	8.28 (0.17)	<0.001
ITGB2 (mean (SD))	8.61 (0.25)	8.89 (0.38)	8.24 (0.42)	8.23 (0.28)	<0.001
RAB31 (mean (SD))	8.55 (0.29)	8.94 (0.42)	8.07 (0.43)	7.78 (0.19)	<0.001
C3AR1 (mean (SD))	8.53 (0.33)	8.97 (0.34)	7.64 (0.62)	7.59 (0.58)	<0.001
PSMD12 (mean (SD))	8.20 (0.16)	8.51 (0.18)	7.96 (0.33)	8.44 (0.32)	<0.001
GYG1 (mean (SD))	8.34 (0.23)	8.57 (0.32)	7.62 (0.45)	8.21 (0.67)	<0.001
DEGS1 (mean (SD))	8.08 (0.27)	8.36 (0.19)	7.53 (0.32)	8.15 (0.45)	<0.001
VAPA (mean (SD))	8.08 (0.23)	8.36 (0.19)	7.75 (0.38)	7.80 (0.26)	<0.001
CD93 (mean (SD))	7.99 (0.20)	8.47 (0.38)	7.69 (0.29)	7.71 (0.25)	<0.001
GLIPR1 (mean (SD))	8.10 (0.32)	8.37 (0.32)	7.22 (0.42)	7.06 (0.23)	<0.001
FGR (mean (SD))	7.55 (0.17)	8.08 (0.27)	7.75 (0.22)	7.81 (0.19)	<0.001
ARMC8 (mean (SD))	7.82 (0.19)	8.11 (0.24)	7.49 (0.31)	7.37 (0.32)	<0.001
GCA (mean (SD))	7.52 (0.31)	8.14 (0.36)	6.93 (0.32)	7.65 (0.23)	<0.001
PPIE (mean (SD))	7.62 (0.25)	7.40 (0.26)	7.12 (0.24)	7.47 (0.34)	<0.001
SELL (mean (SD))	7.12 (0.43)	7.97 (0.55)	6.26 (0.59)	7.11 (0.38)	<0.001
SLC11A1 (mean (SD))	6.45 (0.33)	7.46 (0.55)	6.91 (0.55)	6.68 (0.32)	<0.001
CR1 (mean (SD))	6.45 (0.43)	6.96 (0.45)	5.82 (0.65)	7.17 (0.42)	<0.001
MME (mean (SD))	5.89 (0.44)	6.57 (0.74)	5.44 (0.44)	7.14 (1.30)	<0.001
FCGR2A (mean (SD))	6.65 (0.40)	7.00 (0.38)	5.77 (0.50)	5.49 (0.18)	<0.001
RNASE2 (mean (SD))	5.39 (0.64)	6.36 (1.36)	4.89 (0.30)	5.54 (0.49)	<0.001
